# Supplementary material for: The Emissions Model Intercomparison Project (Emissions-MIP): quantifying model sensitivity to emission characteristics
Source: Copernicus journal article supplement (doi:10.5194/egusphere-2023-604), 2023-04-11
Supplement: Supplementary file 1 [file egusphere-2023-604-supplement.zip]

Archive with 2 entries (2 files):
- Emissions-MIP Experimental Protocol - v1b.xlsx
- Emissions-MIP_Phase1a_Supplement.pdf
