# Supplementary material for: The Emissions Model Intercomparison Project (Emissions-MIP): quantifying model sensitivity to emission characteristics
Source: Copernicus journal article supplement (doi:10.5194/egusphere-2023-604), 2023-04-11
Supplement: Supplementary file 1 [file egusphere-2023-604-supplement.zip › Emissions-MIP Experimental Protocol - v1b.xlsx]

## Sheet: Sheet1
Emissions-MIP Phase I Experiments
CMOR Experiment Name	base	so2-no-season	bc-no-season	so2-at-height	no-so4	high-so4	additional-scenario1	additional-scenario2	additional-scenario3	additional-scenario4
Model Setting
Tier	1	1	1	1	1	1		1	1	1
Description	base setup for comparing against perturbation experiments.	No emissions seasonality for anthropogenic SO2 emissions.	No emissions seasonality for anthropogenic BC emissions.	SO2 emitted at height	No sub-grid SO4 formation	High sub-grid SO4 formation	TBD	TBD	TBD	TBD
Model-Type	AOGCM/CTM	same as base	same as base	same as base	same as base	same as base	TBD	TBD	TBD	TBD
Ocean	Historical ocean boundary conditions. (HadSST preferred)*	same as base	same as base	same as base	same as base	same as base	TBD	TBD	TBD	TBD
Start Year	1999	same as base	same as base	same as base	same as base	same as base	TBD	TBD	TBD	TBD
End Year	2005 (2014)^^	same as base	same as base	same as base	same as base	same as base	TBD	TBD	TBD	TBD
Nudged Winds (for AOGCM)	Yes (MERRA 2 preferred)*	same as base	same as base	same as base	same as base	same as base	TBD	TBD	TBD	TBD
SO2 Emissions Seasonality+	As in CMIP6 input data for anthropogenic emissions (including SO4)	Identical annual-average monthly emission fluxes for all anthropogenic SO2 emissions (including associated SO4)	same as base	same as base	same as base	same as base	TBD	TBD	TBD	TBD
BC Emissions Seasonality+	As in CMIP6 input data for anthropogenic emissions	same as base	Identical annual-average monthly emission fluxes for anthropogenic BC emissions	same as base	same as base	same as base	TBD	TBD	TBD	TBD
SO2 Injection Height	All anthropogenic SO2 (and associated SO4) at surface	same as base	same as base	Anthropogenic SO2 (and associated SO4) over land emitted 200-400m above land surface and shipping sector emitted evenly over 100 - 300m above land surface.***	same as base	same as base	TBD	TBD	TBD	TBD
% SO2 emitted as Sulfate**	2.5% (as %S) anthropogenic SO2 emitted into model grid as sulfate	same as base	same as base	same as base	0% (as %S) anthropogenic SO2 emitted into model grid as sulfate **	7.5% (as %S) anthropogenic SO2 emitted into model grid as sulfate ** (see note)	TBD	TBD	TBD	TBD
All Other Emissions	As in CMIP6 historical experiments for these years	same as base	same as base	same as base	same as base	same as base	TBD	TBD	TBD	TBD
* If models have setups for multiple wind or ocean surface temperature data, these datasets are preferred for consistency, but use of other datasets are fine as well. CTMs can use their default set-up if that is easier than using MERRA2 and HadSST.
** Note that in the alternative SO2 to SO4 sub-grid conversion cases (no-so4 and high-so4), SO2 emissions should be increased/decreased correspondingly so as to preserve total emitted mass of sulfur.
*** Assume emissions distributed evenly across these vertical ranges and proportionally allocate to the relevant model layers.
+ The emissions-MIP project will provide CMIP6-style input emission files with no seasonality for those groups for whom that would be useful.
^^ Because nudged setups are used, we have determined that 5 years will be sufficient for most analysis. If computer or clock time is limited, one year of spin-up and 5 years of model runs are acceptable.
Anthropogenic emissions are defined as in CMIP6 sectors: AGR,RCO,ENE,IND,SLV,TRA,WST,SHP. This excludes emissions from burning of forests, grasslands, and agricultural waste on fields (AWB). Model default treatment for open burning emissions should be used.
1999 is a spin-up year - model results will be analyized over 2000-2014 (or 2000-2005 for 5-year runs)
