# Supplementary material for: The Emissions Model Intercomparison Project (Emissions-MIP): quantifying model sensitivity to emission characteristics
Source: Copernicus journal article supplement (doi:10.5194/egusphere-2023-604), 2023-04-11
Supplement: Supplementary file 1 [file egusphere-2023-604-supplement.zip › Emissions-MIP_Phase1a_Supplement.pdf]

## **Supplementary Material for The Emissions Model Intercomparison Project (Emissions-MIP): quantifying model sensitivity to emission characteristics**

**Hamza Ahsan<sup>1</sup>, Hailong Wang<sup>2</sup>, Jingbo Wu<sup>3</sup>, Mingxuan Wu<sup>2</sup>, Steven J. Smith<sup>1</sup>, Susanne Bauer<sup>3</sup>, Harrison Suchyta<sup>1</sup>, Dirk Olivié<sup>4</sup>, Gunnar Myhre<sup>5</sup>, Hitoshi Matsui<sup>6</sup>, Huisheng Bian<sup>7</sup>, Jean-François Lamarque<sup>8</sup>, Ken Carslaw<sup>9</sup>, Larry Horowitz<sup>10</sup>, Leighton Regayre<sup>9,11</sup>, Mian Chin<sup>7</sup>, Michael Schulz<sup>4</sup>, Ragnhild Bieltvedt Skeie<sup>5</sup>, Toshihiko Takemura<sup>12</sup>, Vaishali Naik<sup>10</sup>**

<sup>1</sup>Joint Global Change Research Institute, Pacific Northwest National Laboratory, College Park, MD, USA

<sup>2</sup>Atmospheric Sciences and Global Change Division, Pacific Northwest National Laboratory, Richland, WA, USA

<sup>3</sup>NASA Goddard Institute for Space Studies, New York, NY, USA

<sup>4</sup>Norwegian Meteorological Institute, Oslo, Norway

<sup>5</sup>CICERO Center for International Climate Research, Oslo, Norway

<sup>6</sup>Graduate School of Environmental Studies, Nagoya University, Nagoya, Japan

<sup>7</sup>NASA Goddard Space Flight Center, Greenbelt, MD, USA

<sup>8</sup>Climate and Global Dynamics Laboratory, National Center for Atmospheric Research, Boulder, CO, USA

<sup>9</sup>Institute for Climate and Atmospheric Science, School of Earth and Environment, University of Leeds, Leeds, UK

<sup>10</sup>NOAA Geophysical Fluid Dynamics Laboratory, Princeton, NJ, USA

<sup>11</sup>Met Office Hadley Centre, Exeter, Fitzroy Road, Exeter, Devon, UK

<sup>12</sup>Research Institute for Applied Mechanics, Kyushu University, Fukuoka, Japan

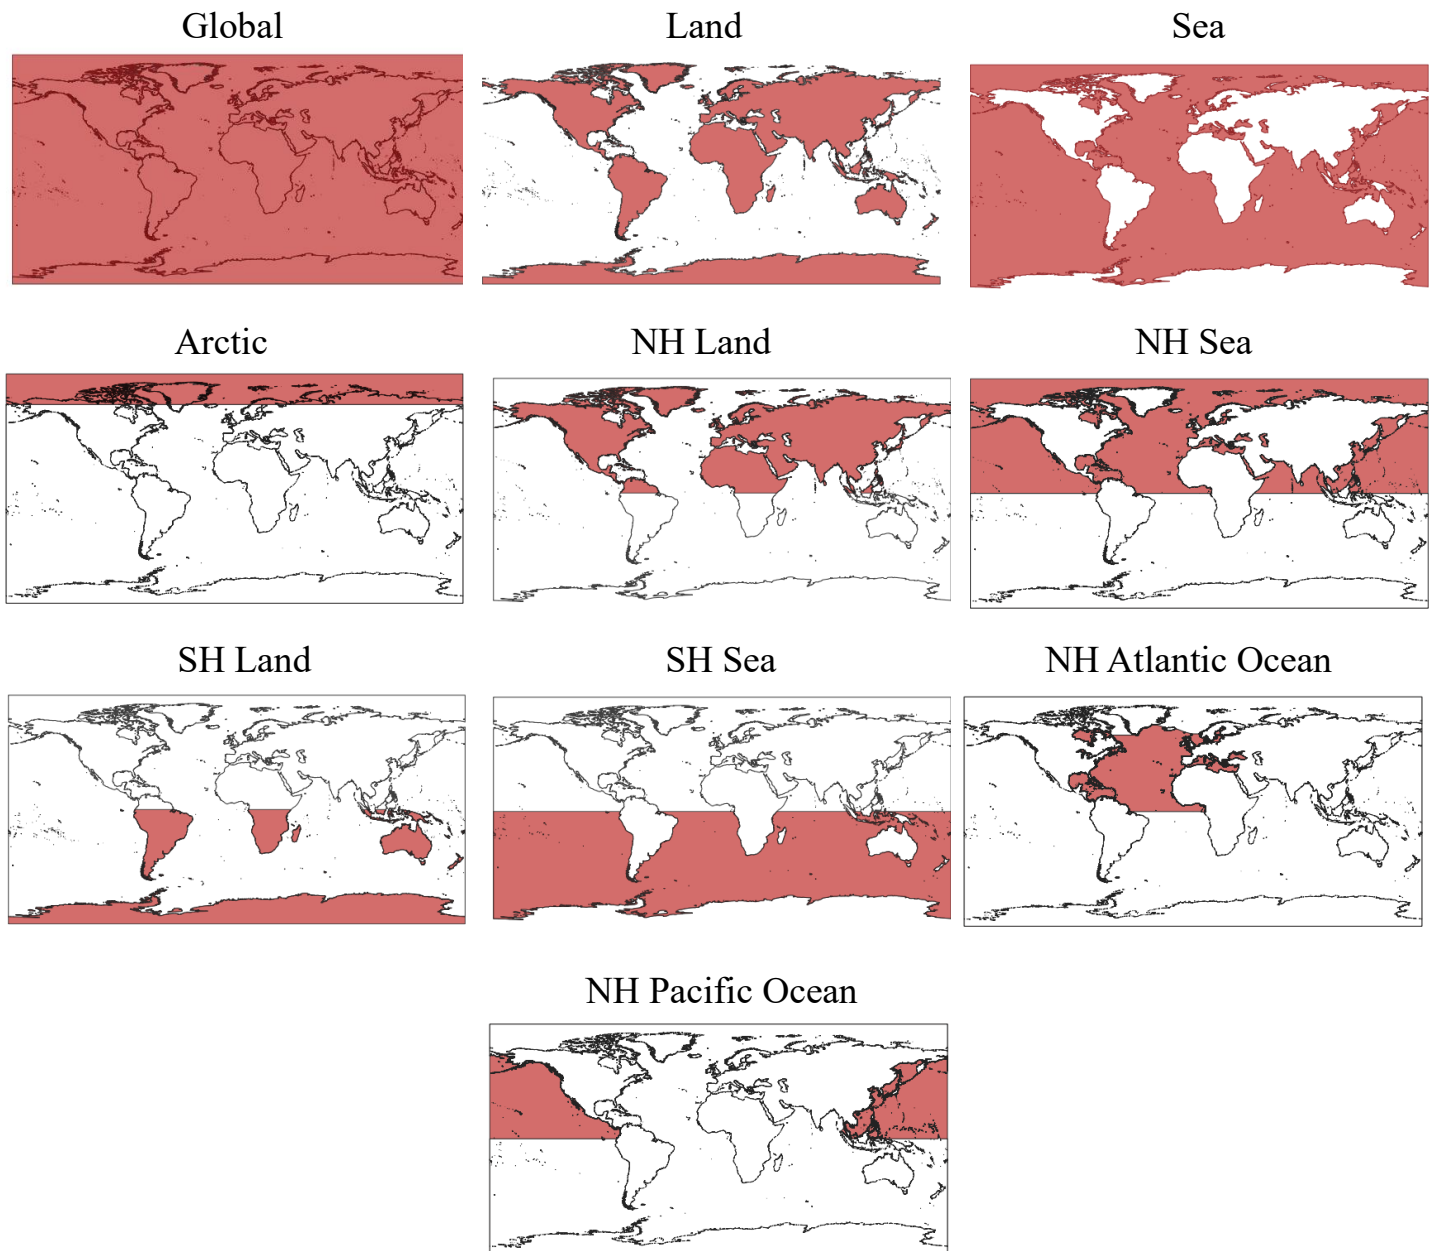

Figure S1: Global maps showing the various regions shaded in red for which diagnostics were calculated using ESMValTool.

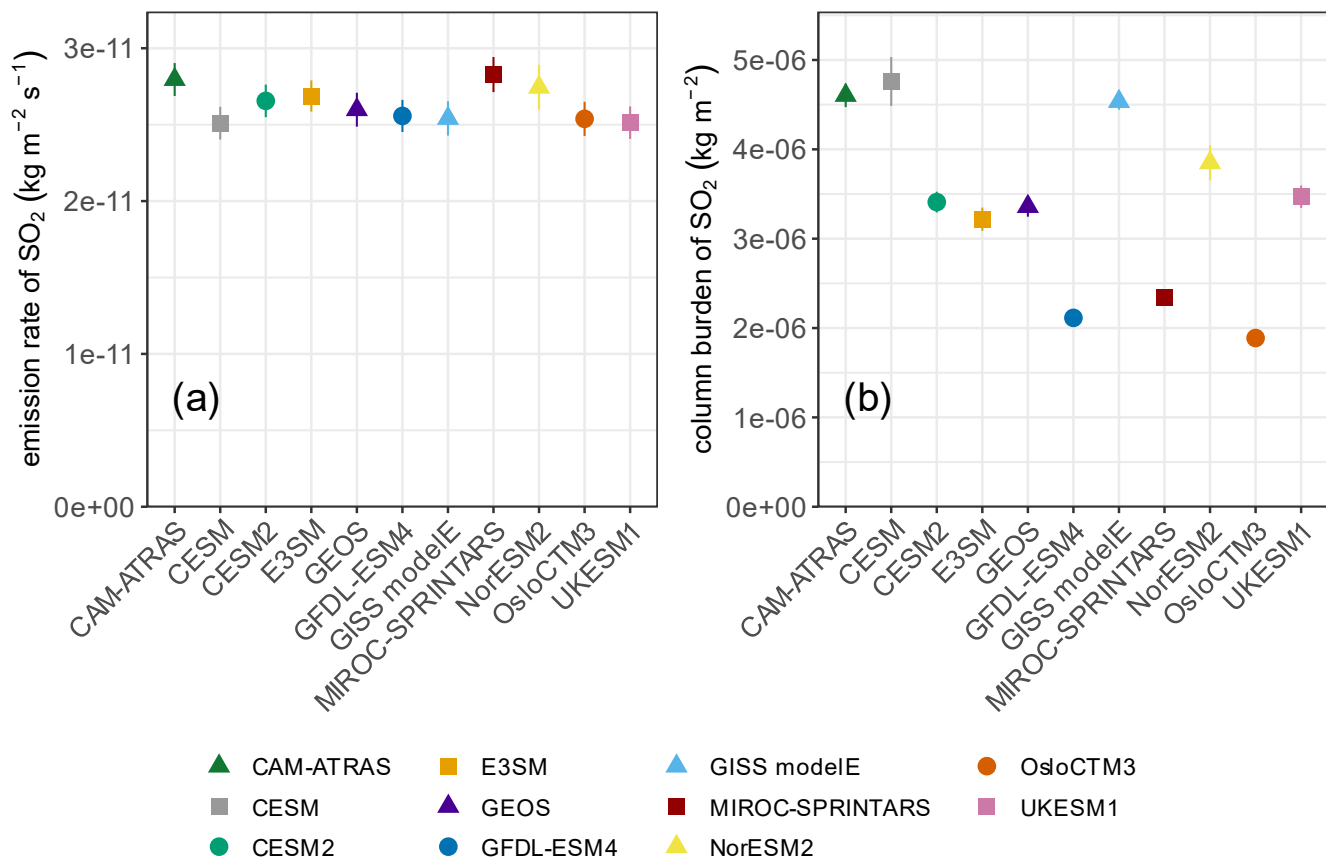

Figure S2: (a) Northern Hemisphere land SO<sub>2</sub> emission rate and (b) SO<sub>2</sub> column burden of the reference case model simulations. All results are averaged over the years 2000 – 2004, except NorESM2 is averaged over 2001 – 2005. The error bars represent interannual variability ( $\pm 1 \sigma$ ).

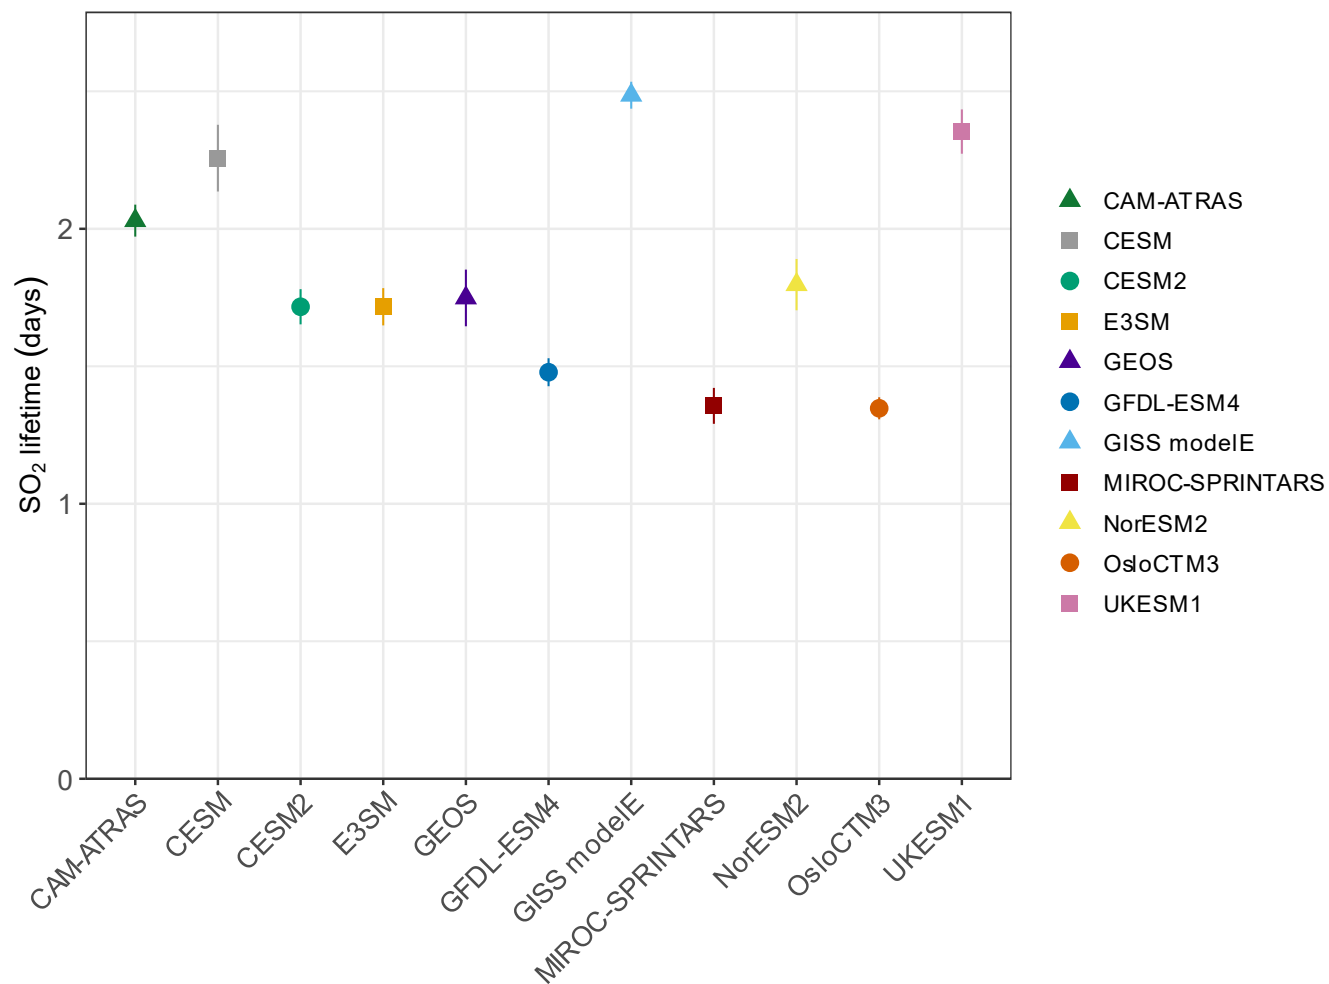

Figure S3: Global SO<sub>2</sub> lifetime of the reference case model simulations. All results are averaged over the years 2000 – 2004, except NorESM2 is averaged over 2001 – 2005. The error bars represent interannual variability ( $\pm 1 \sigma$ ).

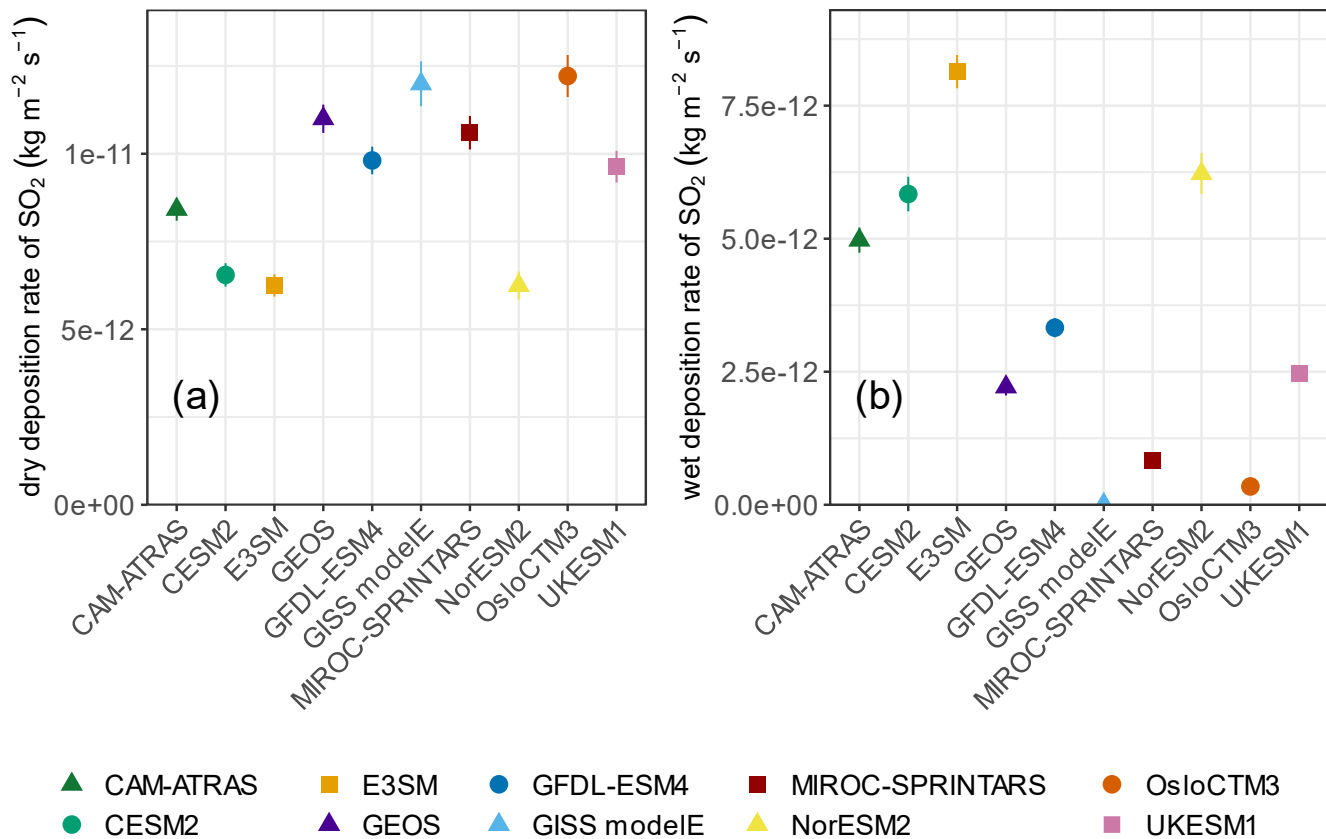

Figure S4: (a) Northern Hemisphere land dry SO<sub>2</sub> deposition rate and (b) wet SO<sub>2</sub> deposition rate of the reference case model simulations. All results are averaged over the years 2000 – 2004, except NorESM2 is averaged over 2001 – 2005. The error bars represent interannual variability ( $\pm 1 \sigma$ ).

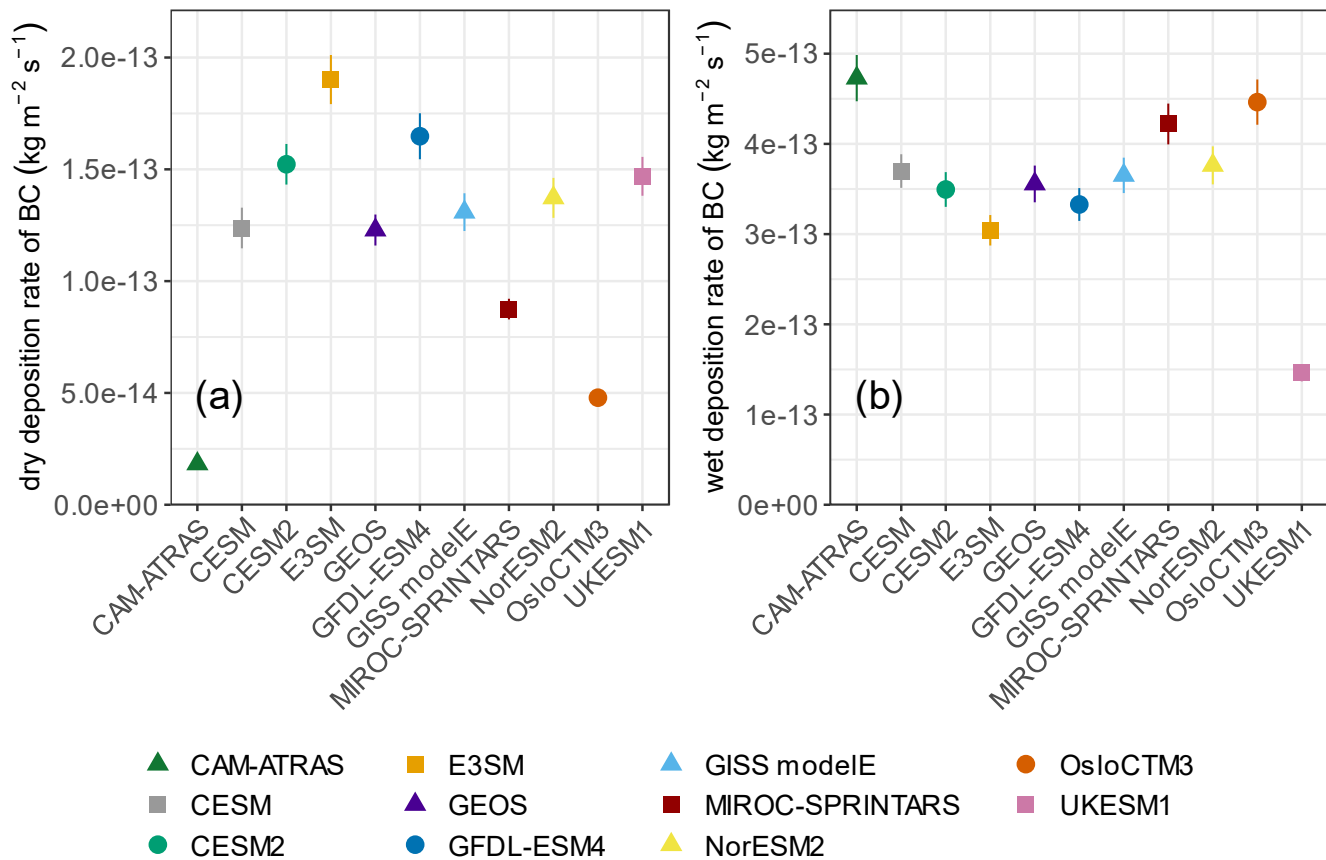

Figure S5: (a) Global dry BC deposition rate and (b) wet BC deposition rate of the reference case model simulations. All results are averaged over the years 2000 – 2004, except NorESM2 is averaged over 2001 – 2005. The error bars represent interannual variability ( $\pm 1 \sigma$ ).

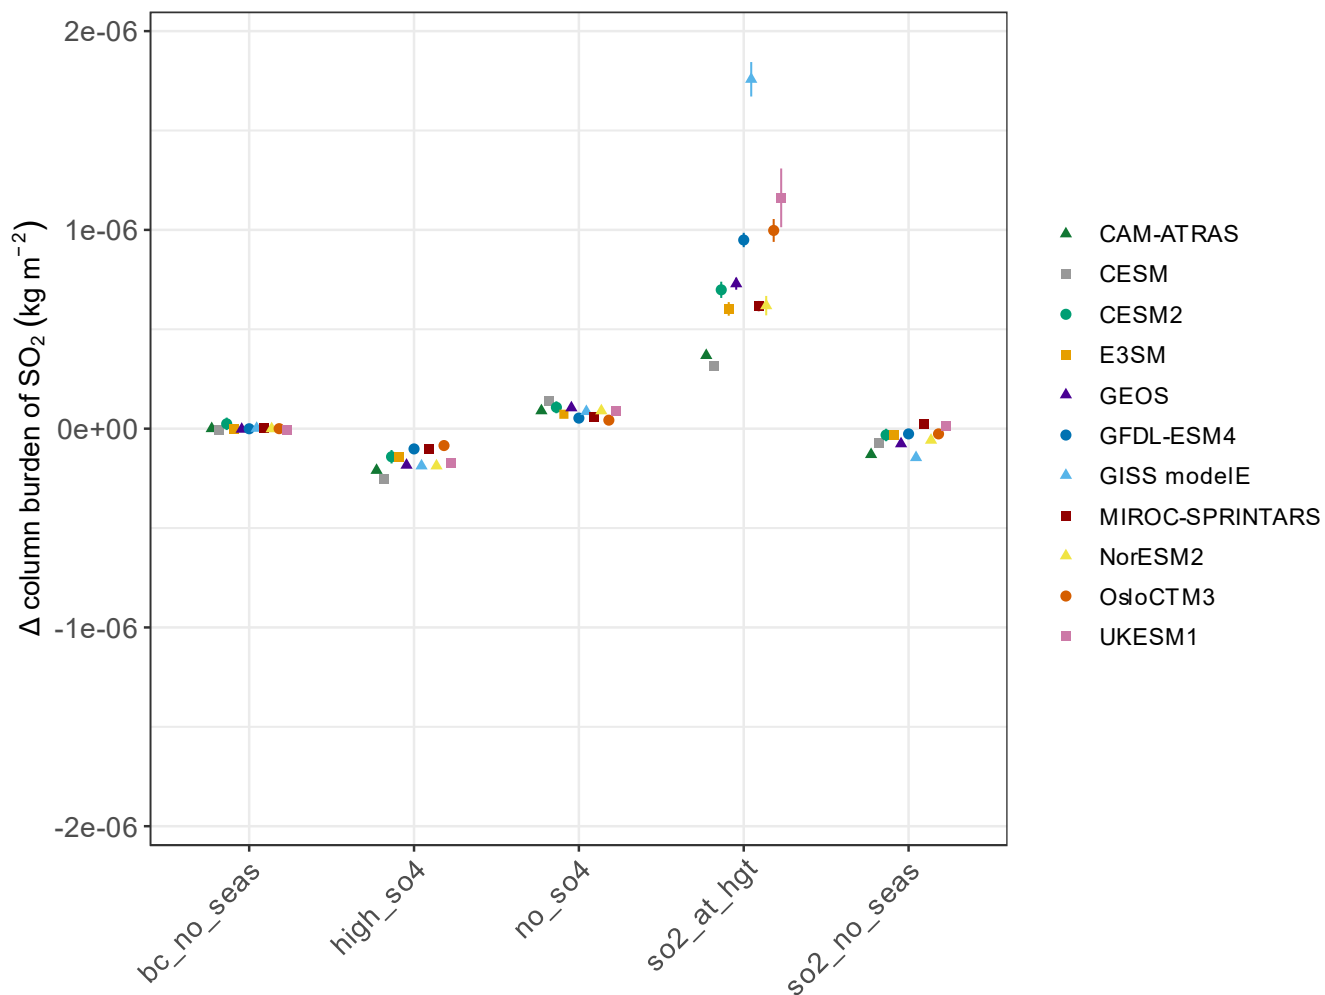

Figure S6: Absolute difference of Northern Hemisphere land  $\text{SO}_2$  column burden for each perturbation. All results are averaged over the years 2000 – 2004, except NorESM2 is averaged over 2001 – 2005. The uncertainty bars represent interannual variability ( $\pm 1 \sigma$ ).

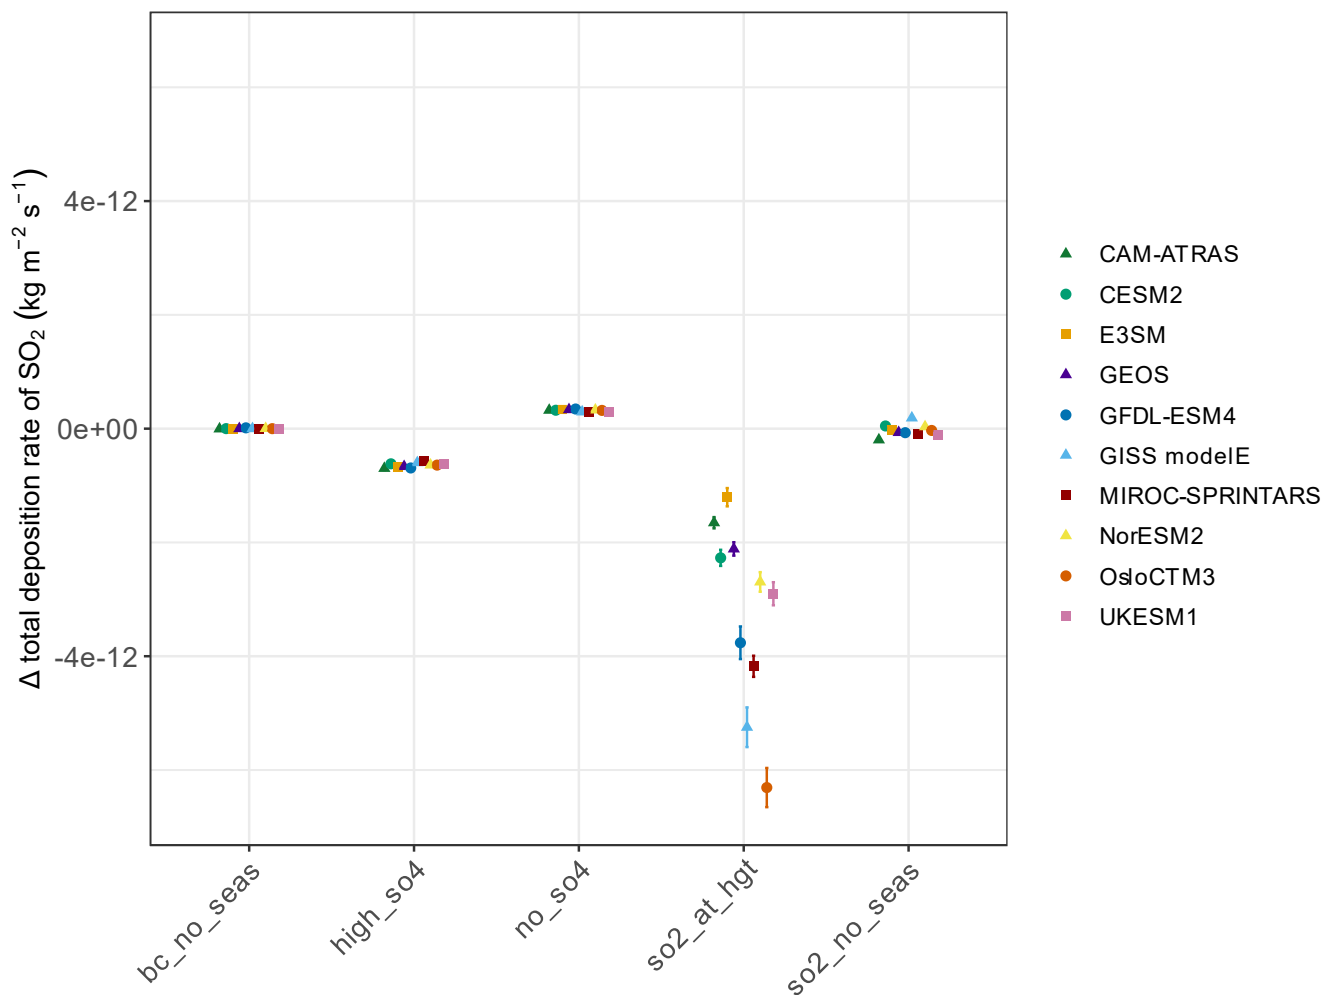

Figure S7: Absolute difference of Northern Hemisphere land total SO<sub>2</sub> deposition rate for each perturbation. All results are averaged over the years 2000 – 2004, except NorESM2 is averaged over 2001 – 2005. The uncertainty bars represent interannual variability ( $\pm 1 \sigma$ ).

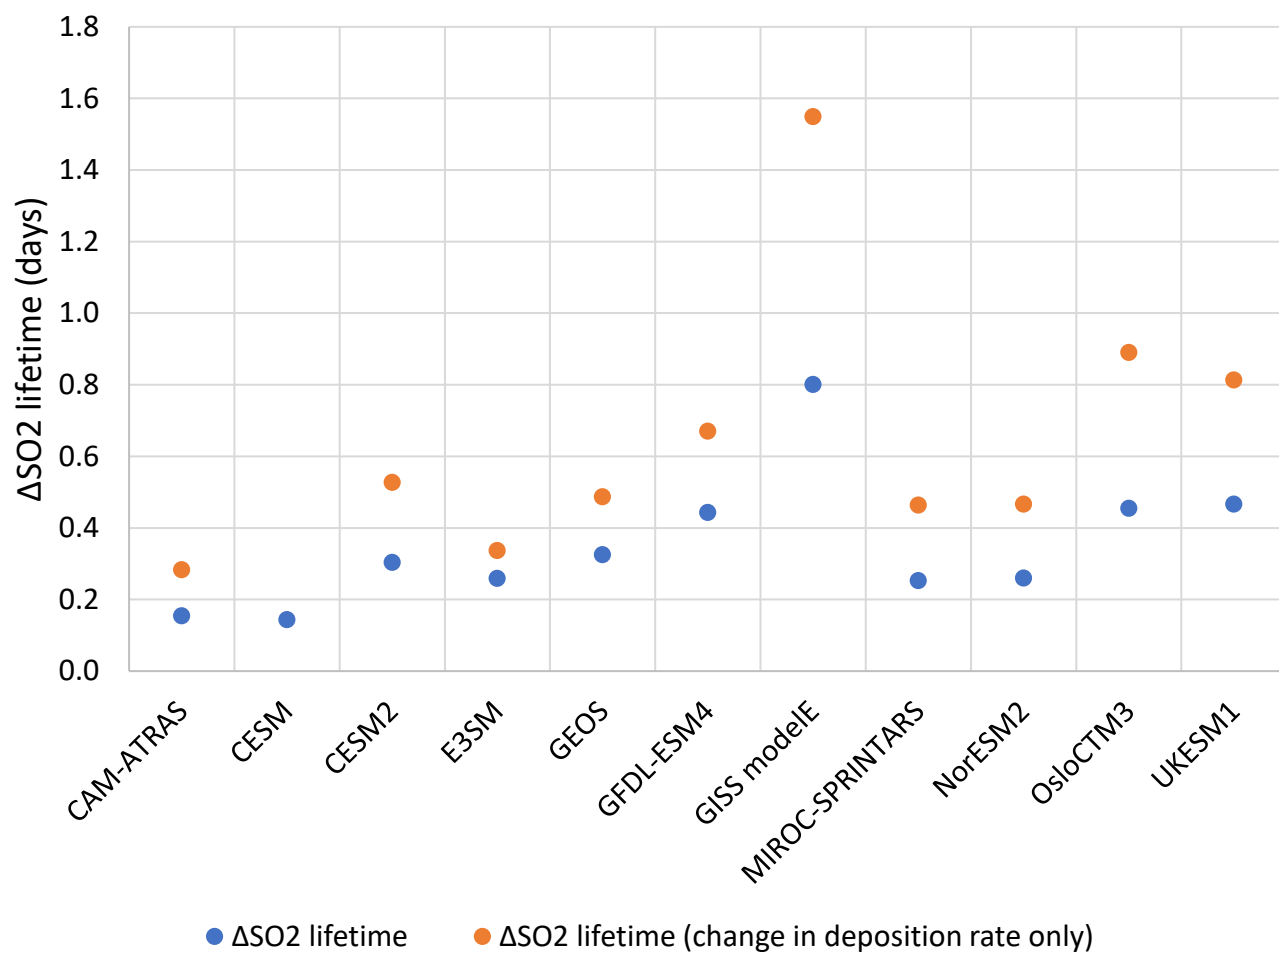

Figure S8: Absolute difference (emission at height – reference) of Northern Hemisphere land  $\text{SO}_2$  lifetime, showing the relative impact of deposition vs chemical conversion. All results are averaged over the years 2000 – 2004, except NorESM2 is averaged over 2001 – 2005.

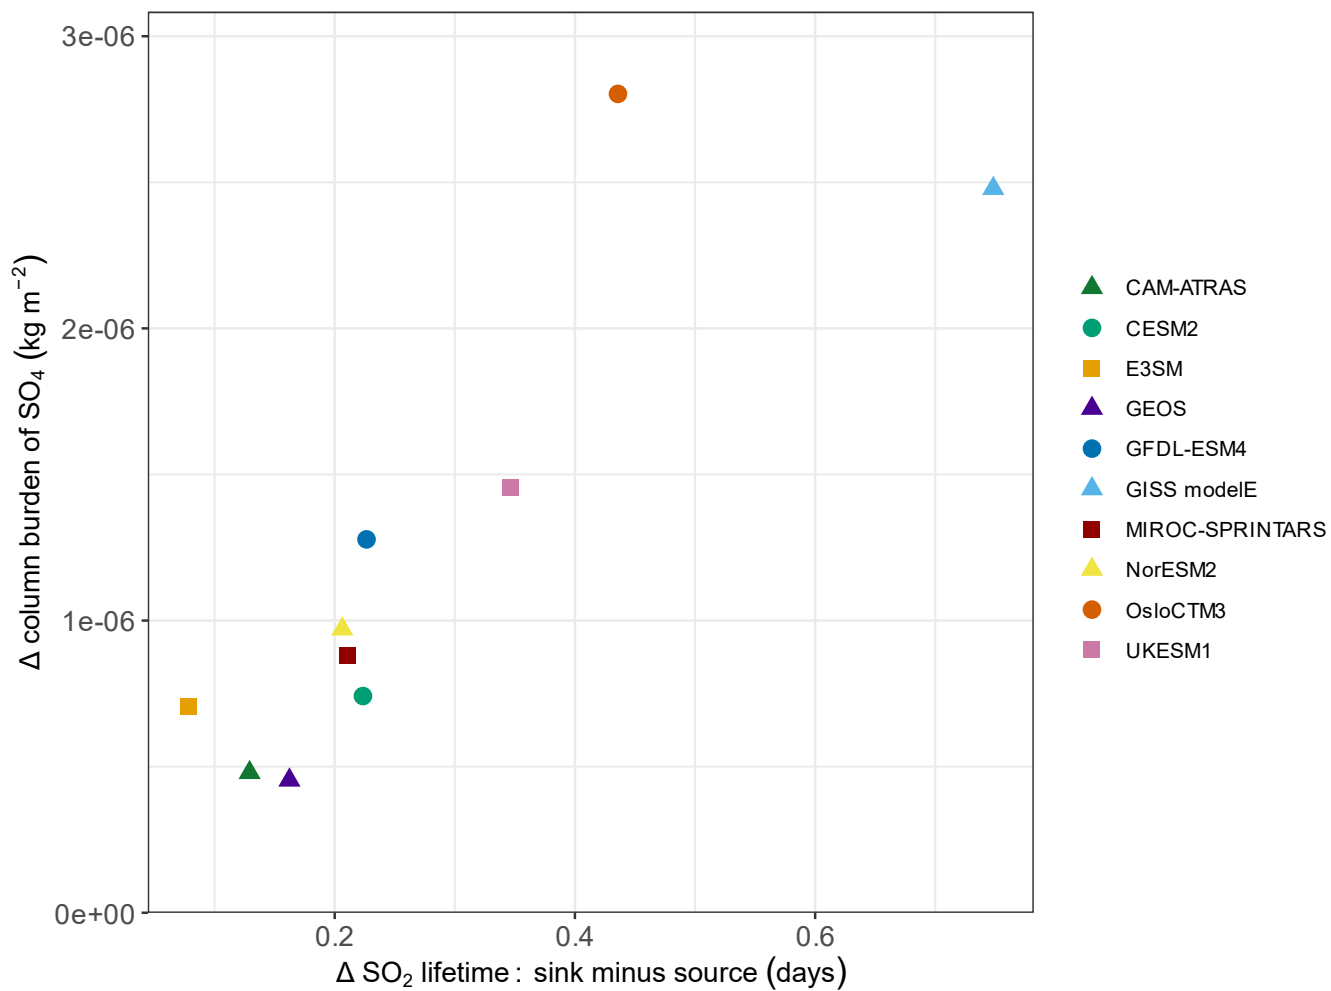

Figure S9: Absolute difference (emission at height – reference) of Northern Hemisphere land sulfate column burden vs SO<sub>2</sub> lifetime offset (sink minus source). All results are averaged over the years 2000 – 2004, except NorESM2 is averaged over 2001 – 2005.

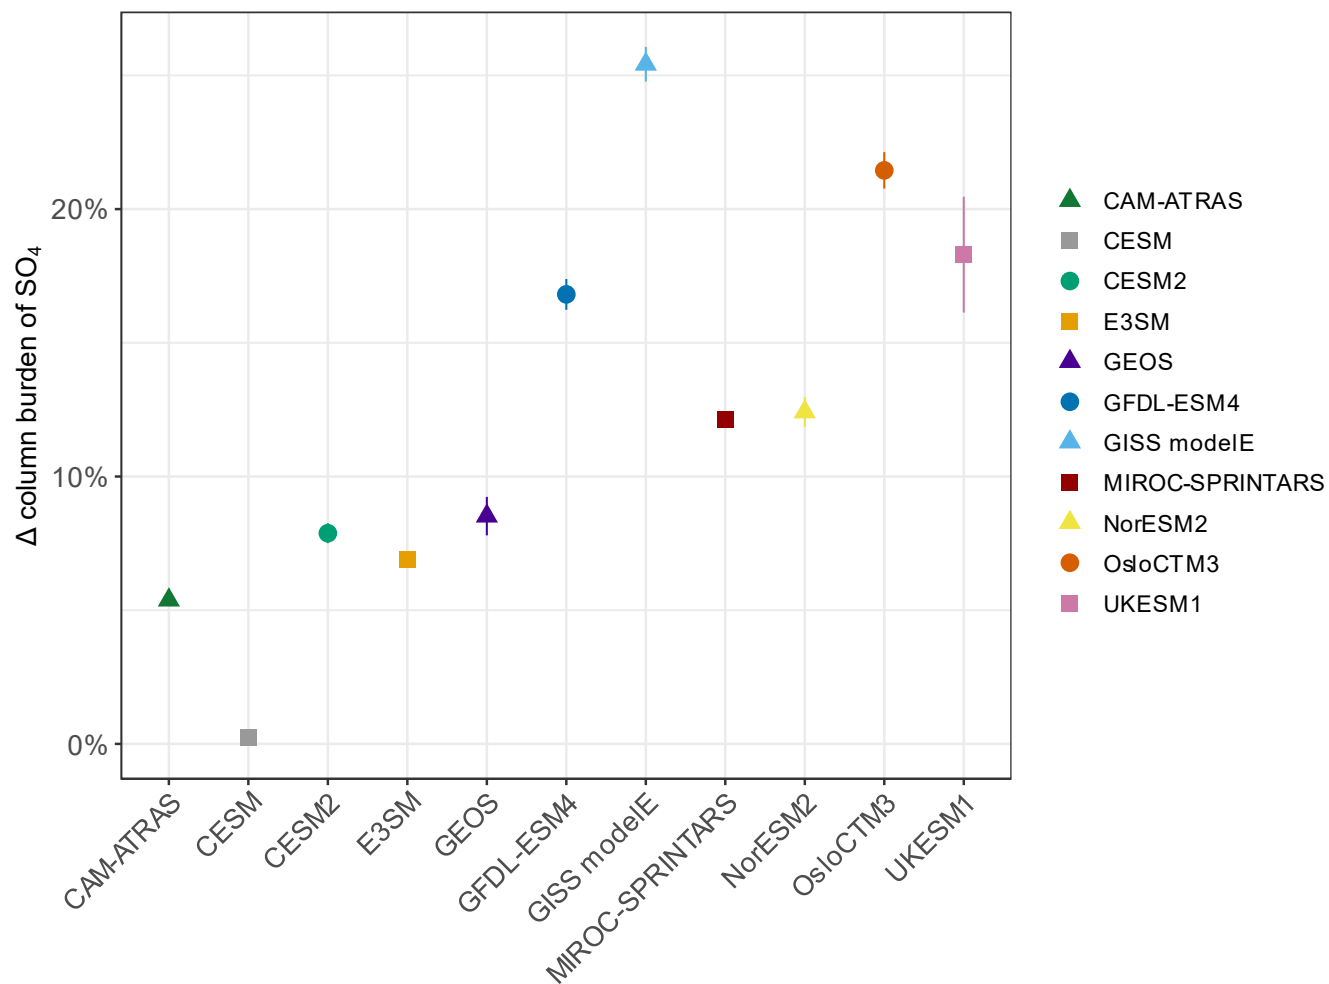

Figure S10: Percent difference (emission at height – reference) of global mean sulfate column burden. All results are averaged over the years 2000 – 2004, except NorESM2 is averaged over 2001 – 2005. The uncertainty bars represent interannual variability ( $\pm 1 \sigma$ ).

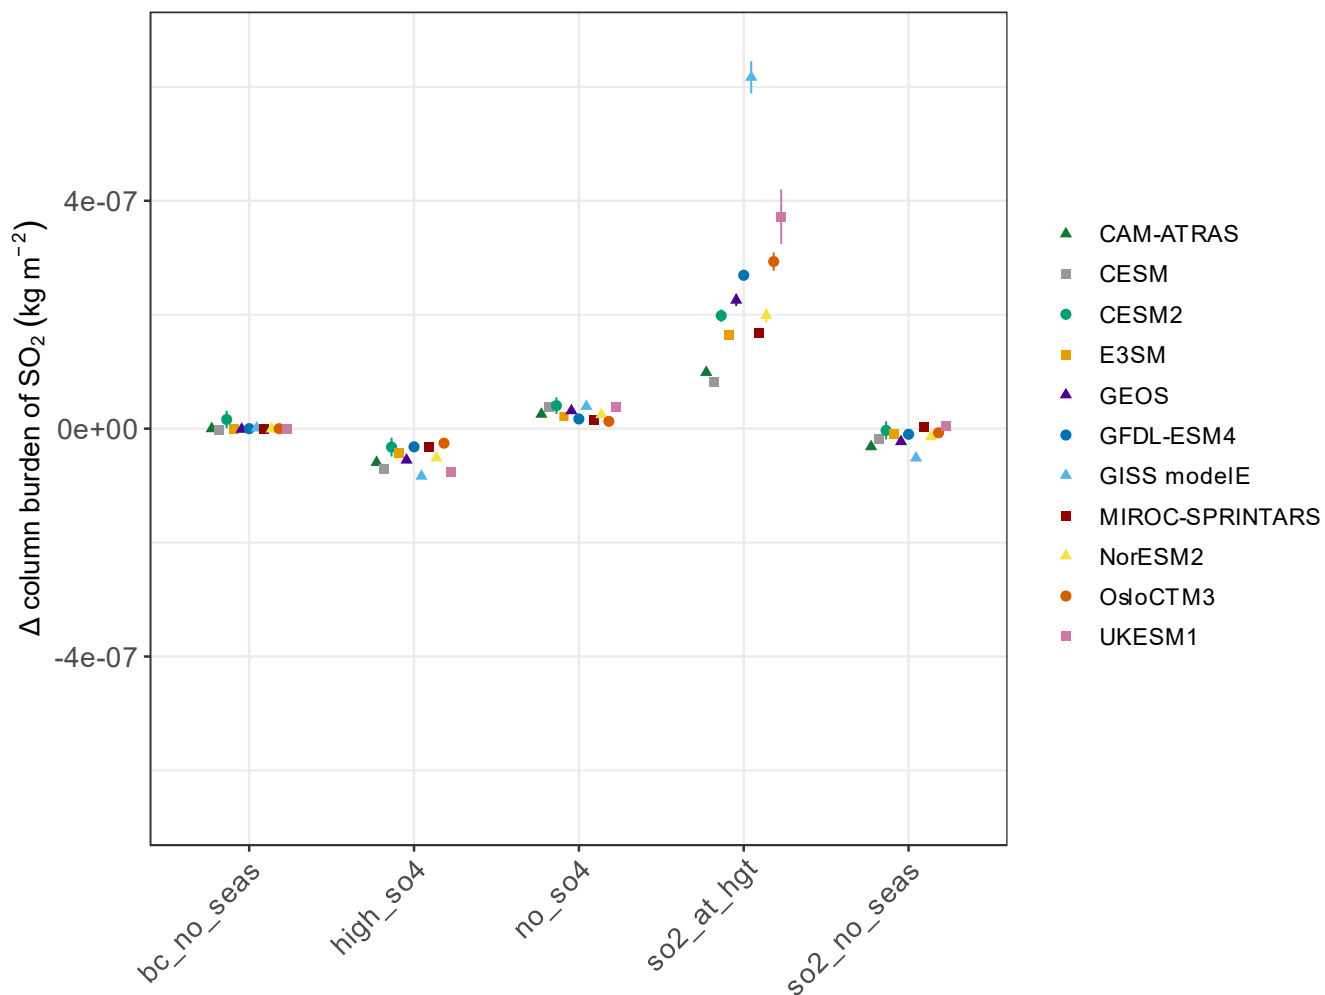

Figure S11: Absolute difference of global mean SO<sub>2</sub> column burden for each perturbation. All results are averaged over the years 2000 – 2004, except NorESM2 is averaged over 2001 – 2005. The uncertainty bars represent interannual variability ( $\pm 1 \sigma$ ).

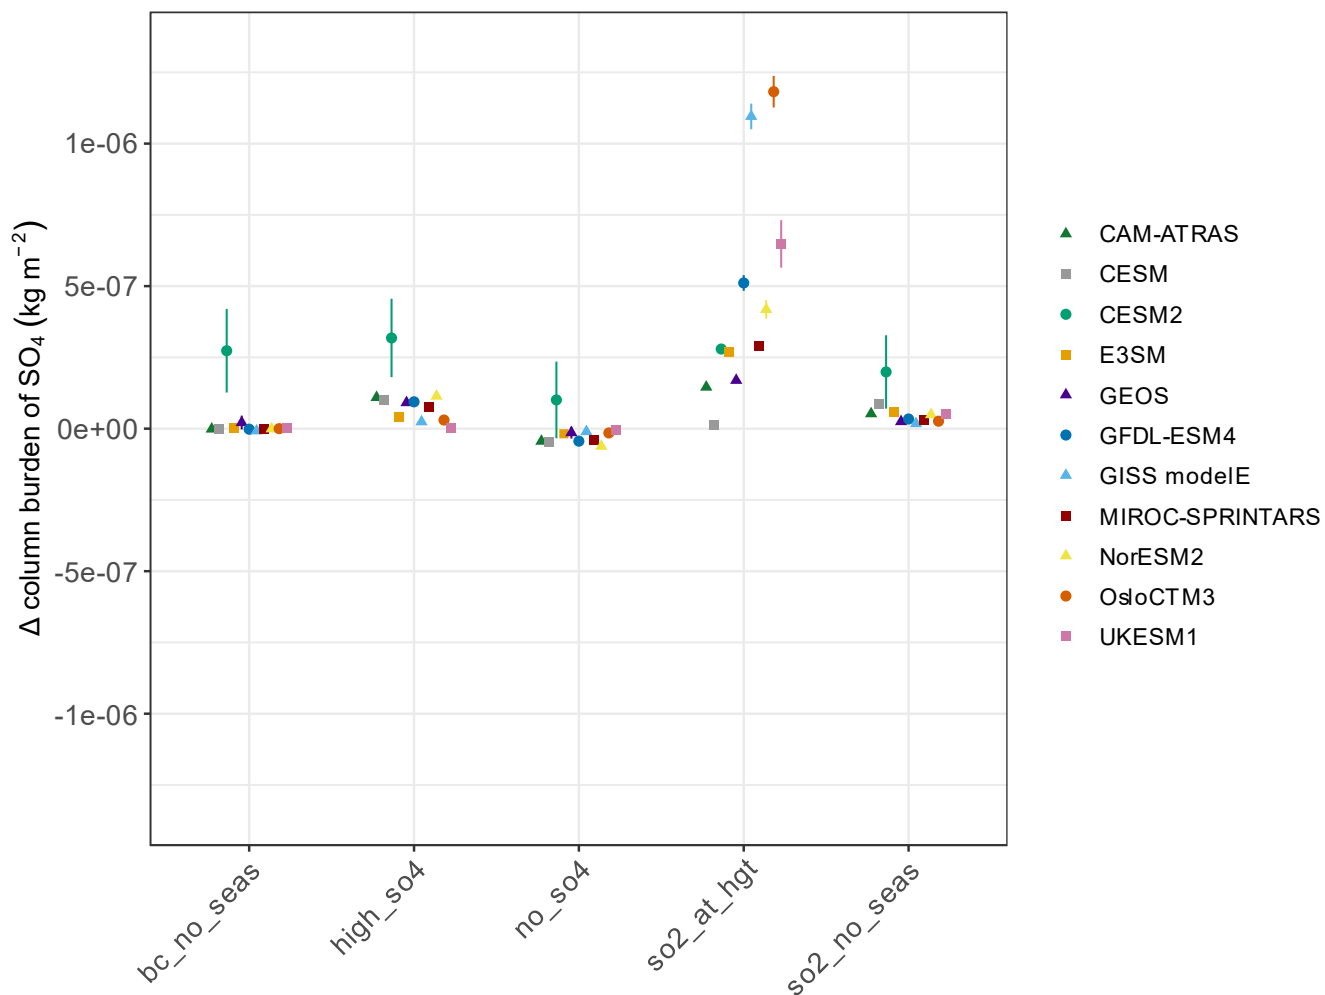

Figure S12: Absolute difference of global mean  $\text{SO}_4$  column burden for each perturbation. All results are averaged over the years 2000 – 2004, except NorESM2 is averaged over 2001 – 2005. The uncertainty bars represent interannual variability ( $\pm 1 \sigma$ ).

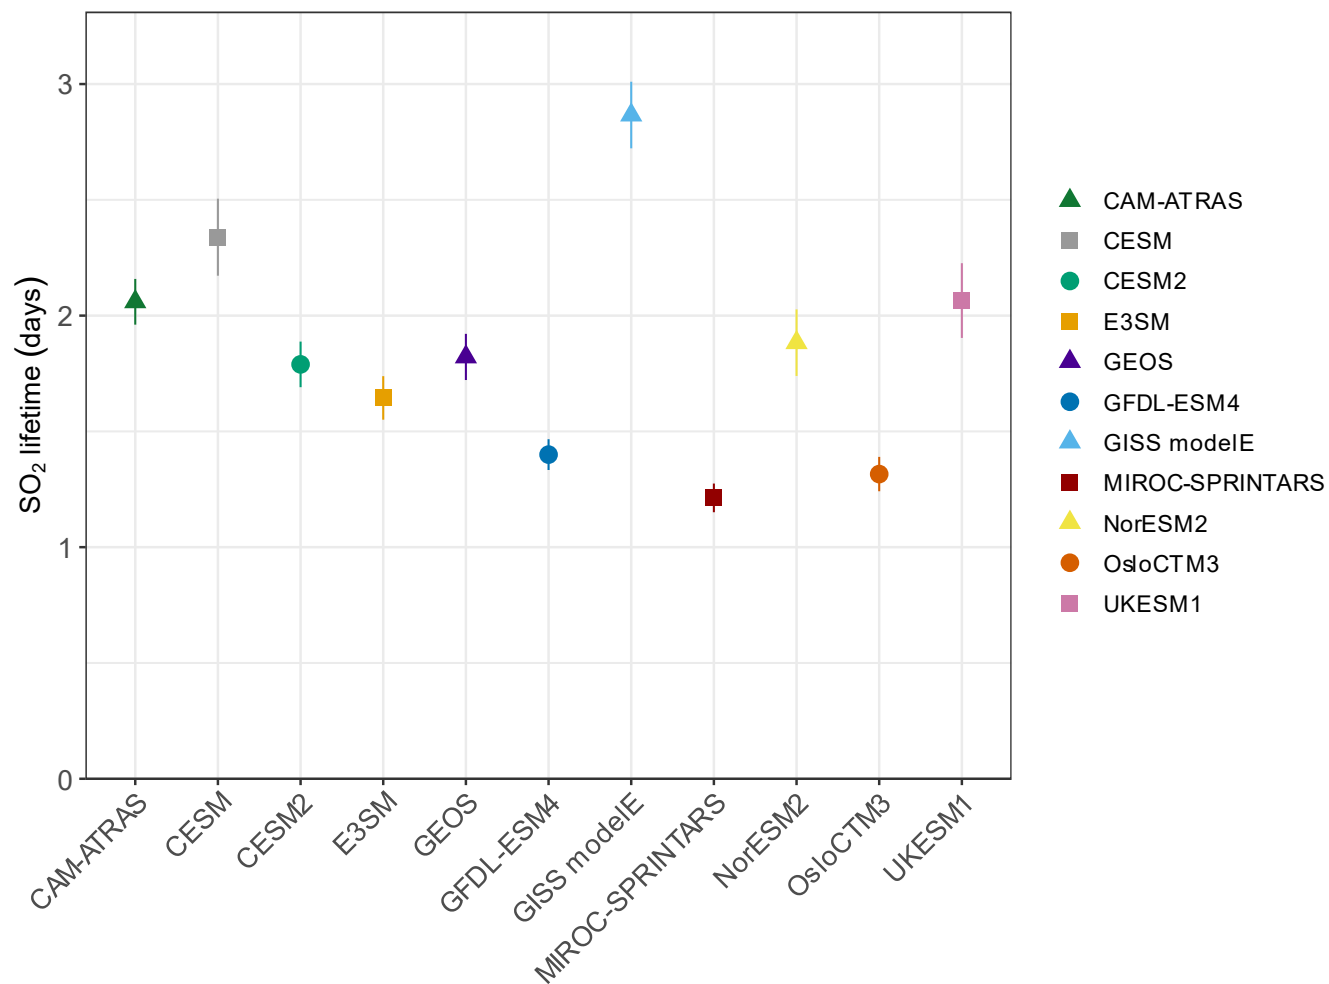

Figure S13: Northern Hemisphere land SO<sub>2</sub> lifetime of the emission at height perturbation simulations. All results are averaged over the years 2000 – 2004, except NorESM2 is averaged over 2001 – 2005. The error bars represent interannual variability ( $\pm 1 \sigma$ ).

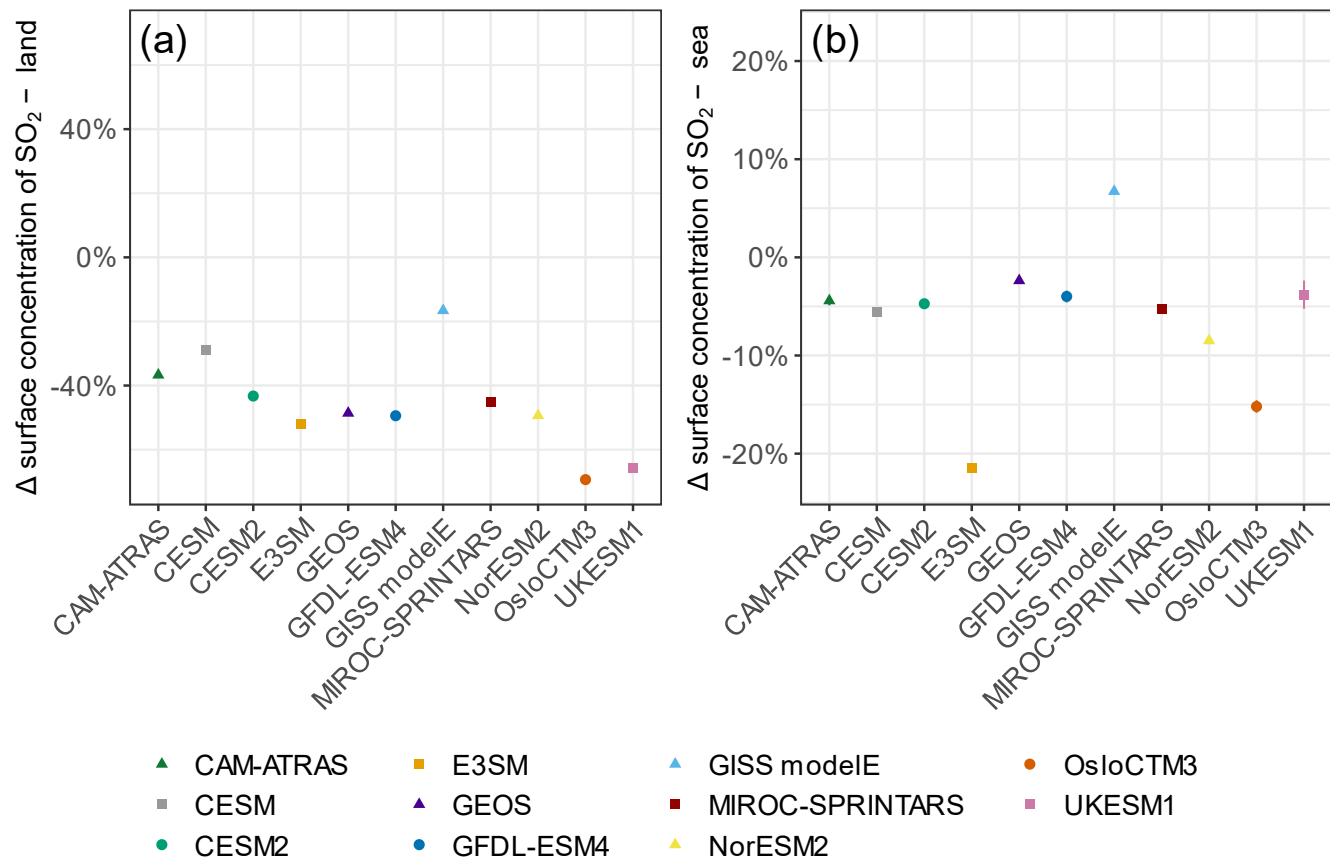

Figure S14: Percent difference (emission at height – reference) of (a) land surface concentration of SO<sub>2</sub> and (b) sea surface concentration of SO<sub>2</sub>. All results are averaged over the years 2000 – 2004, except NorESM2 is averaged over 2001 – 2005. The error bars represent interannual variability ( $\pm 1 \sigma$ ).

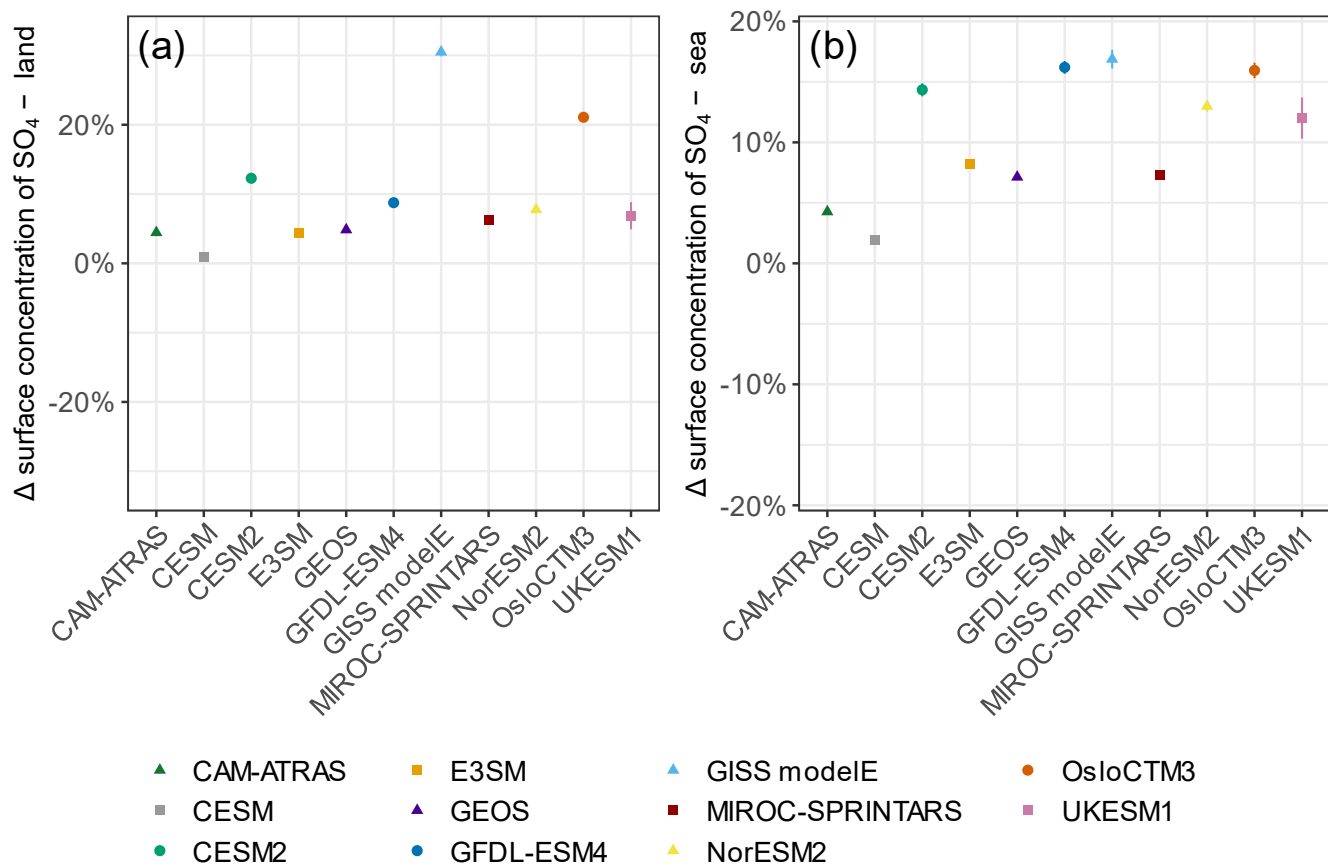

Figure S15: Percent difference (emission at height – reference) of (a) land surface concentration of  $\text{SO}_4$  and (b) sea surface concentration of  $\text{SO}_4$ . All results are averaged over the years 2000 – 2004, except NorESM2 is averaged over 2001 – 2005. The error bars represent interannual variability ( $\pm 1 \sigma$ ).

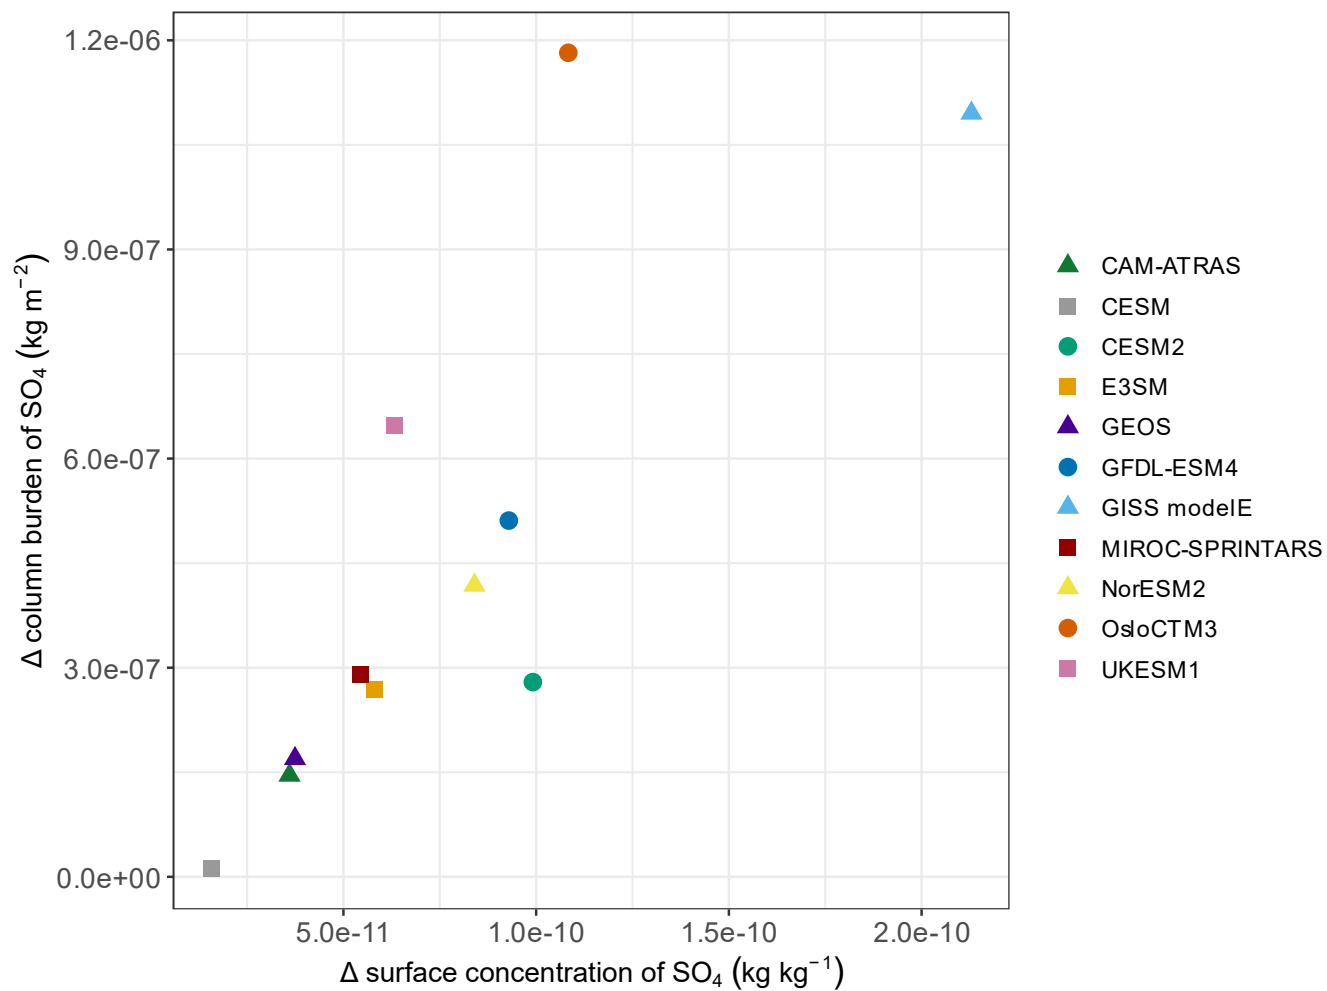

Figure S16: Absolute difference (emission at height – reference) of global mean sulfate column burden vs surface sulfate concentration. All results are averaged over the years 2000 – 2004, except NorESM2 is averaged over 2001 – 2005.

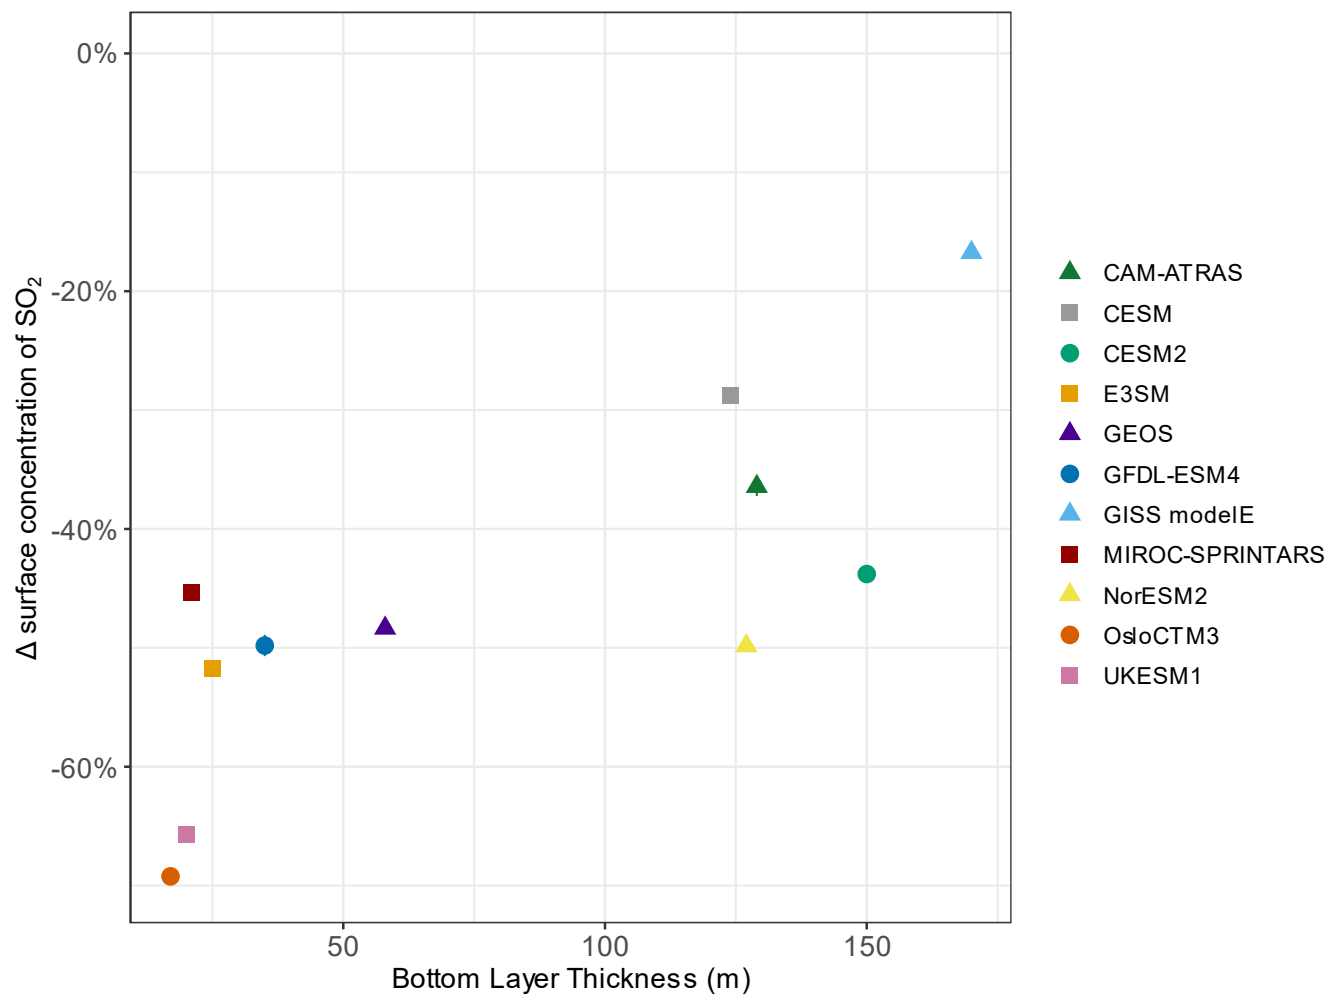

Figure S17: Percent difference (emission at height – reference) of Northern Hemisphere land SO<sub>2</sub> surface concentration vs bottom model layer thickness. All results are averaged over the years 2000 – 2004, except NorESM2 is averaged over 2001 – 2005.

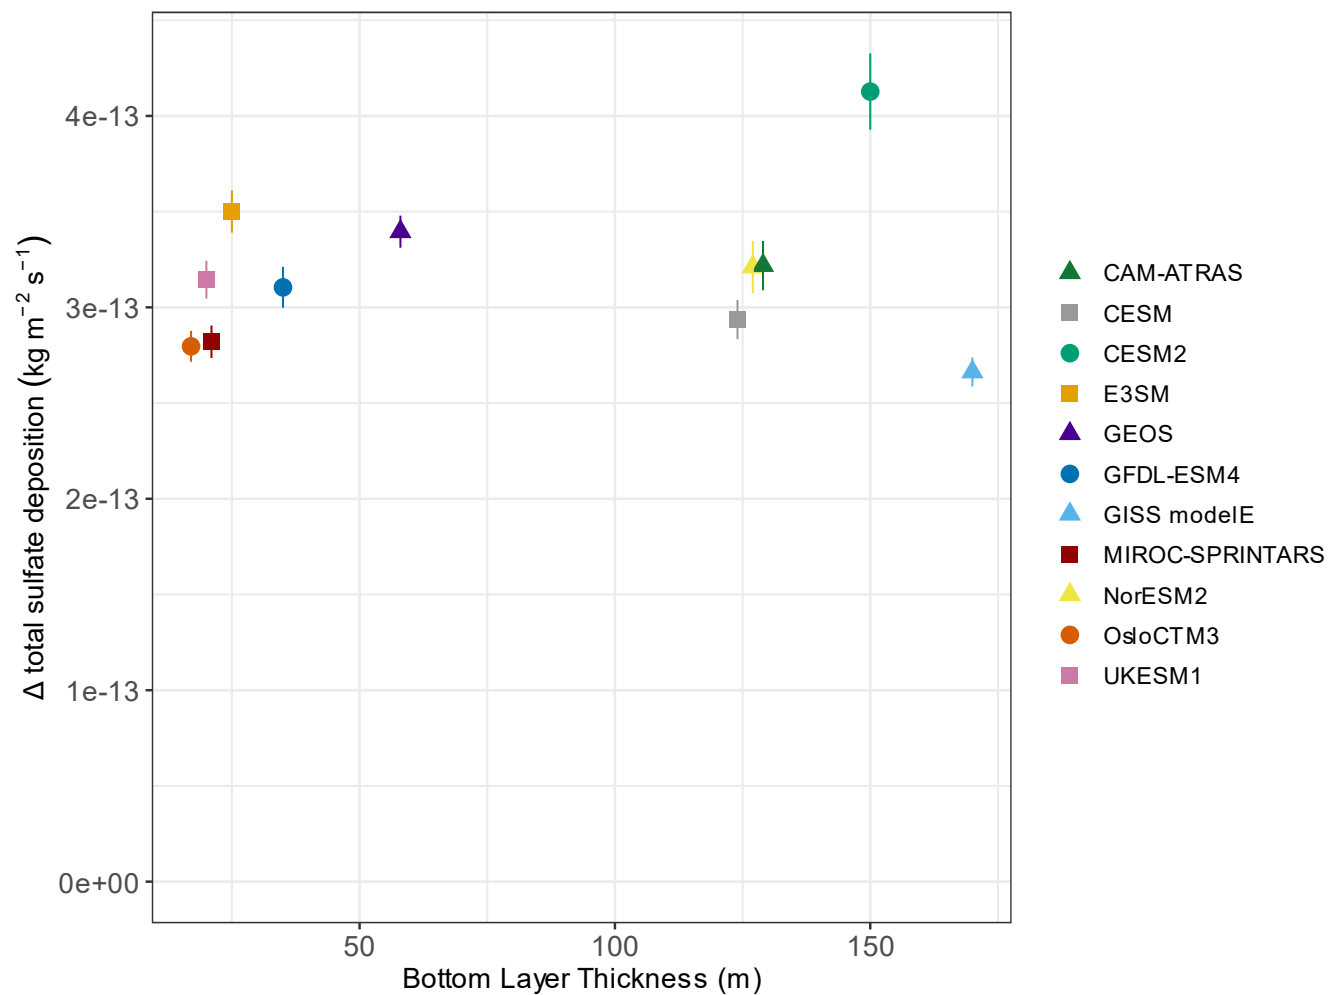

Figure S18: Absolute difference (high  $\text{SO}_4$  – reference) of global mean total sulfate deposition vs bottom model layer thickness. All results are averaged over the years 2000 – 2004, except NorESM2 is averaged over 2001 – 2005. The error bars represent interannual variability ( $\pm 1 \sigma$ ).

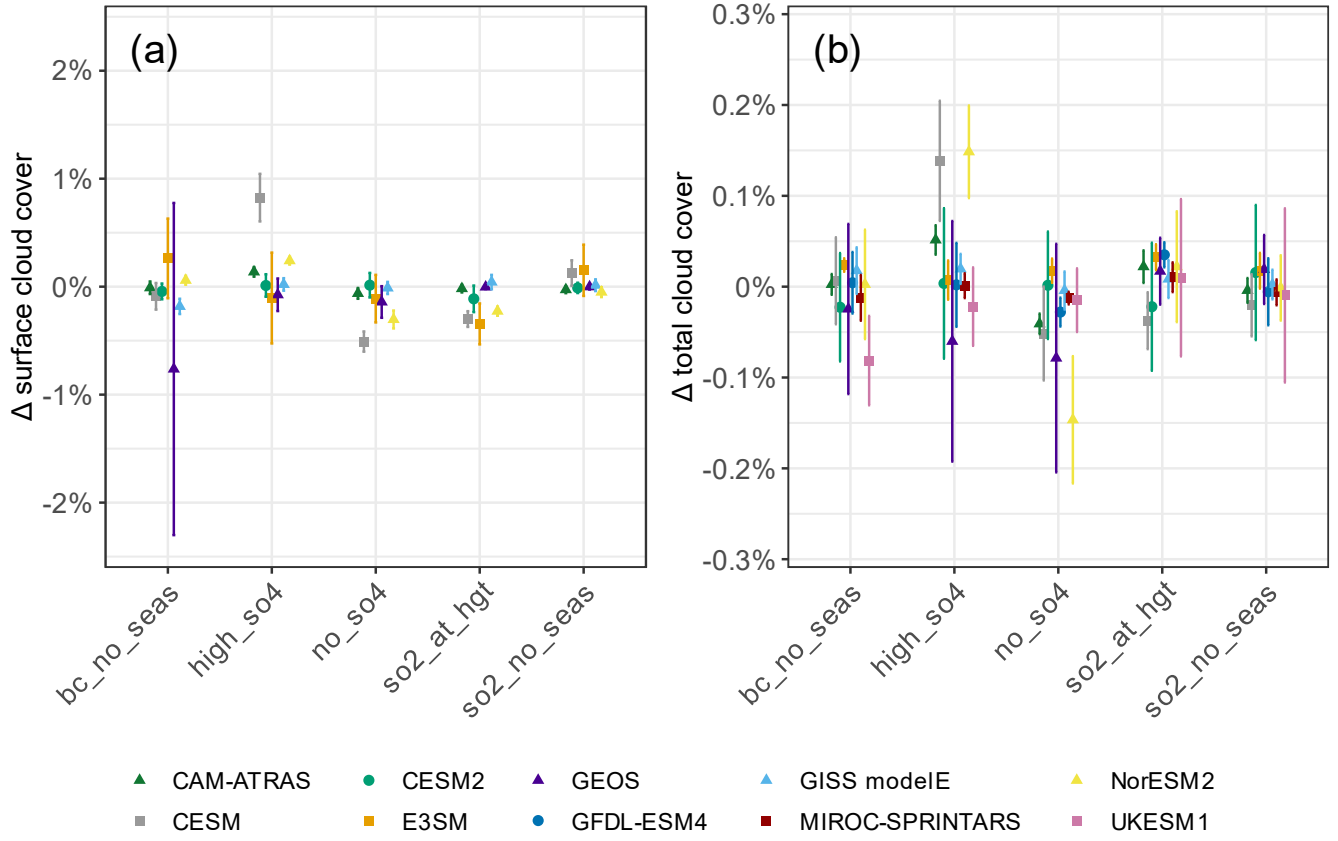

Figure S19: Percent difference of global mean (a) surface cloud cover and (b) total cloud cover for each perturbation. All results are averaged over the years 2000 – 2004, except NorESM2 is averaged over 2001 – 2005. The uncertainty bars represent interannual variability ( $\pm 1 \sigma$ ).

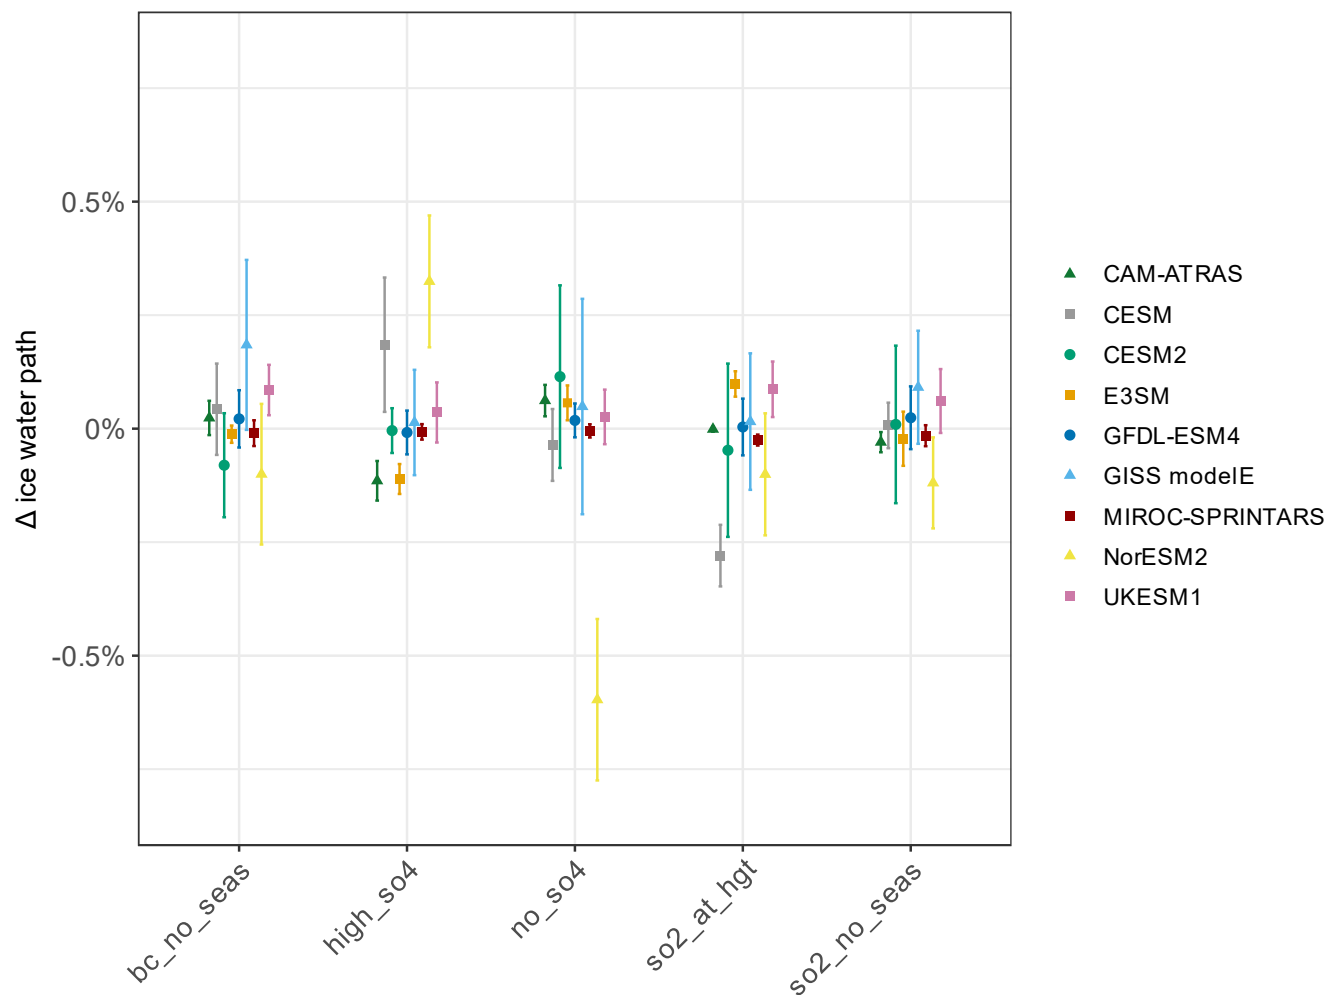

Figure S20: Percent difference of global mean ice water path for each perturbation. All results are averaged over the years 2000 – 2004, except NorESM2 is averaged over 2001 – 2005. The uncertainty bars represent interannual variability ( $\pm 1 \sigma$ ).

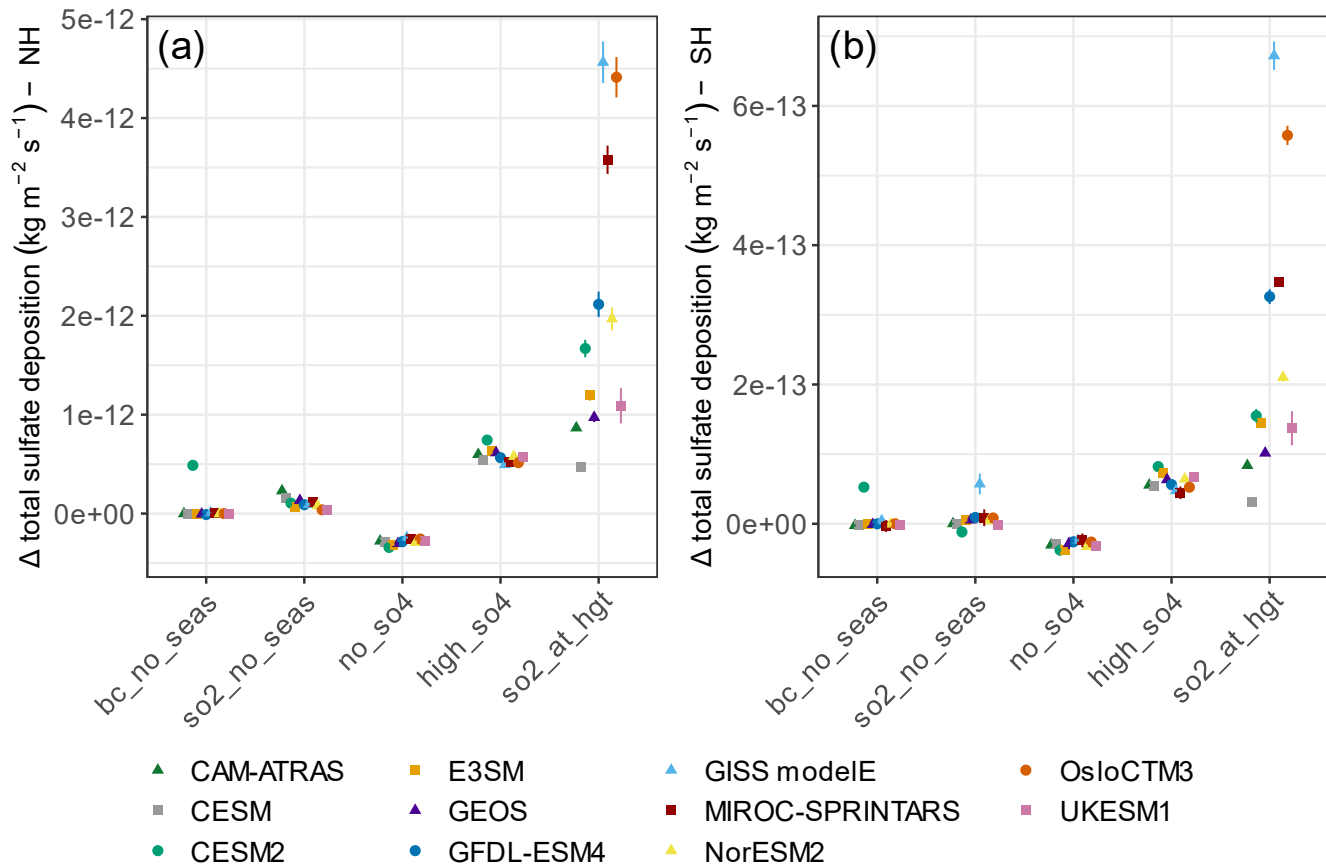

Figure S21: Absolute difference of (a) Northern Hemisphere total sulfate deposition and (b) Southern Hemisphere total sulfate deposition for each perturbation. All results are averaged over the years 2000 – 2004, except NorESM2 is averaged over 2001 – 2005. The uncertainty bars represent interannual variability ( $\pm 1 \sigma$ ).

Table S1: Tabulated values of Figure S8 showing relative impact of deposition vs chemical conversion when estimating change in  $\text{SO}_2$  lifetime over Northern Hemisphere land due to emission at height.

| model                 | $\Delta\text{SO}_2$ lifetime | $\Delta\text{SO}_2$ lifetime (change in deposition rate only) | ratio |
|-----------------------|------------------------------|---------------------------------------------------------------|-------|
| CAM-ATRAS             | 0.15                         | 0.28                                                          | 1.84  |
| CESM                  | 0.14                         |                                                               |       |
| CESM2                 | 0.30                         | 0.53                                                          | 1.74  |
| E3SM                  | 0.26                         | 0.34                                                          | 1.30  |
| GEOS                  | 0.32                         | 0.49                                                          | 1.50  |
| GFDL-ESM4             | 0.44                         | 0.67                                                          | 1.51  |
| GISS modelE           | 0.80                         | 1.55                                                          | 1.94  |
| MIROC-SPRINTARS       | 0.25                         | 0.46                                                          | 1.84  |
| NorESM2               | 0.26                         | 0.47                                                          | 1.79  |
| OsloCTM3              | 0.45                         | 0.89                                                          | 1.96  |
| UKESM1                | 0.47                         | 0.81                                                          | 1.74  |
| Avg                   | 0.35                         | 0.65                                                          | 1.72  |
| Avg (w/o GISS modelE) | 0.31                         | 0.55                                                          | 1.69  |
